# Supplementary material for: One-step hydrothermal preparation of WO 3 –carbon felt for electrolytic recovery of copper from PCB wastewater
Source: Royal Society of Chemistry journal article supplement (doi:10.1039/d5ra07199b), 2025-01-01
Supplement: d5ra07199b1.pdf [file d5ra07199b1.pdf]

## Supplementary Information

### One-step hydrothermal preparation of WO<sub>3</sub>-carbon felt for electrolytic recovery of copper from PCB wastewater

#### Text S1 Determination of COD

According to the HJ/T 399–2007 standard, the chemical oxygen demand (COD) of water samples was determined using the rapid digestion–spectrophotometric method. A silver sulfate–sulfuric acid solution was prepared by adding 5.0 g of silver sulfate to 500 mL of sulfuric acid (1.84 g mL<sup>−1</sup>) and stirring thoroughly. In a digestion tube, 1.00 mL of potassium dichromate solution (0.0833 mol L<sup>−1</sup>), 0.50 mL of mercury sulfate solution (0.24 g mL<sup>−1</sup>), and 6.00 mL of the prepared silver sulfate–sulfuric acid solution were sequentially added. The mixture was homogenized and stored at room temperature in the dark as a pre-mixed reagent. Subsequently, 2.00 mL of the pre-mixed reagent was added to each sample and blank, homogenized, and placed in a DRB200 digestion apparatus preheated to 165 °C for 15 min. After digestion, the tubes were allowed to cool to approximately 60 °C. The tubes were inverted several times while holding the caps to ensure uniform distribution of the contents, and the outer surfaces were wiped with lint-free paper. After cooling to room temperature, the absorbance was measured at 600 ± 20 nm using water as the reference solution with a spectrophotometer. The COD concentration was calculated from the calibration curve.

#### Text S2 Simulated copper-containing wastewater formulation

The simulated wastewater was prepared based on the typical composition of actual

23 PCB wastewater. The formulation included copper sulfate pentahydrate ( $\text{CuSO}_4 \cdot 5\text{H}_2\text{O}$ )  
 24 at a dosage of 19,531 mg/L (equivalent to 5000 mg/L of  $\text{Cu}^{2+}$ ), concentrated sulfuric  
 25 acid (98%  $\text{H}_2\text{SO}_4$ ) at 10 mL/L (resulting in a pH of approximately 0.7), glucose at 937  
 26 mg/L (corresponding to a COD of 1000 mg/L), and ammonium sulfate ( $(\text{NH}_4)_2\text{SO}_4$ ) at  
 27 94.34 mg/L (providing 20 mg/L of  $\text{NH}_4^+\text{-N}$ ).

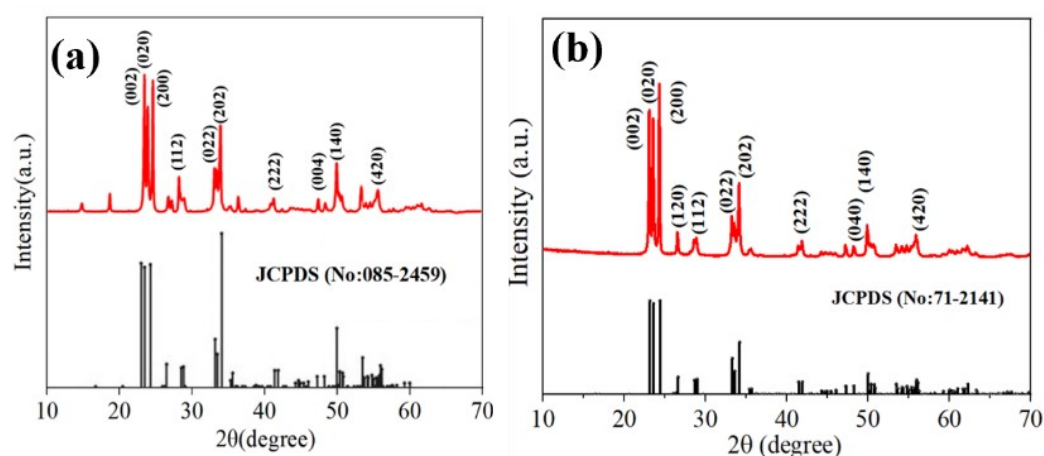

29 **Figure S1.** XRD spectra of (a)  $\text{WO}_3$  powder and (b)  $\text{WO}_3$ -carbon felt electrode.

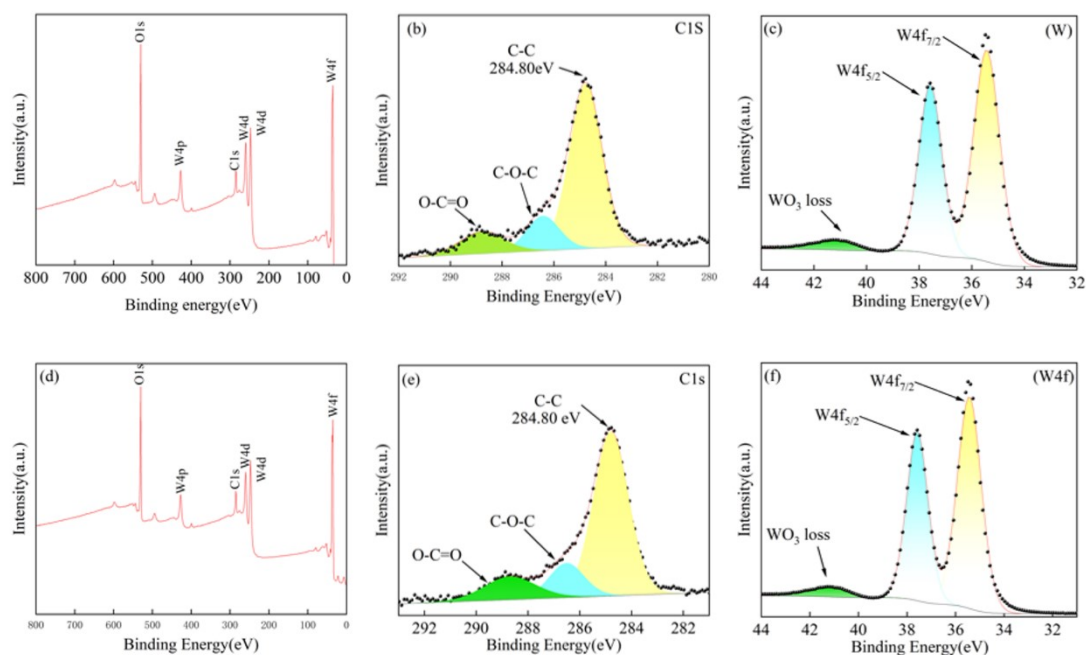

31 **Figure S2** XPS spectra of (a-c)  $\text{WO}_3$  powder and (d-f)  $\text{WO}_3$ -carbon felt electrode.

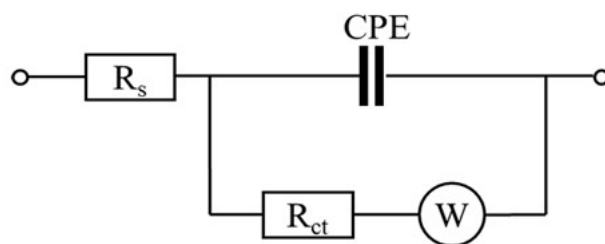

32

33 **Figure S3** Equivalent circuit diagram for EIS testing.

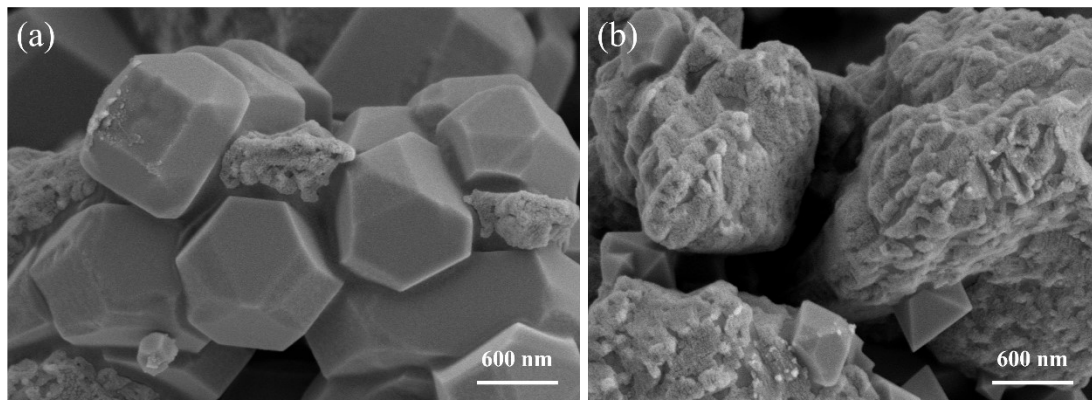

34

35 **Figure S4** SEM images of copper recovered.

36
